# Supplementary material for: Homogeneous and well-aligned GaN nanowire arrays via a modified HVPE process and their cathodoluminescence properties
Source: Royal Society of Chemistry journal article supplement (doi:10.1039/d1nr07753h), 2021-12-14
Supplement: d1nr07753h1.pdf [file d1nr07753h1.pdf]

# Homogeneous and well-aligned GaN nanowire array via a modified HVPE process and their cathodoluminescence properties

Cai Zhang<sup>a,b,1</sup>, Xin Jin<sup>c,1</sup>, Yan liang<sup>a</sup>, Liu Yang<sup>a,b</sup>, Jing Li<sup>d</sup>, Rui Wang<sup>\*e</sup>, Baodan Liu<sup>d</sup>,

Xuewei Lv<sup>\*c</sup>, and Xin Jiang<sup>\*a</sup>

<sup>a</sup>Shenyang National Laboratory for Materials Science (SYNL), Institute of Metal Research (IMR), Chinese Academy of Sciences (CAS), No. 72, Wenhua Road, Shenhe District, Shenyang, 110016, China

<sup>b</sup>School of Materials Science and Engineering, University of Science and Technology of China, No. 72 Wenhua Road, Shenhe District, Shenyang, 110016, China

<sup>c</sup>College of Materials Science and Engineering, Chongqing University, Chongqing 400044, China

<sup>d</sup>Foshan Graduate School of Northeastern University, No. 2, Zhihui Road, Foshan, China

<sup>e</sup>Institute for Structure and Function and Department of Physics, Chongqing University, Chongqing 400044, China

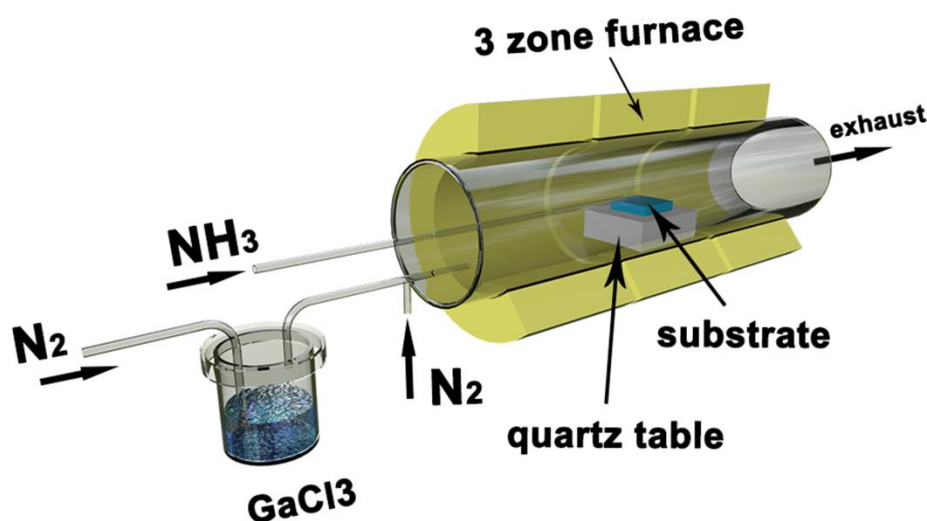

**Fig. S1** Schematic diagram of the home-made modified HVPE gas pipeline and reactor.

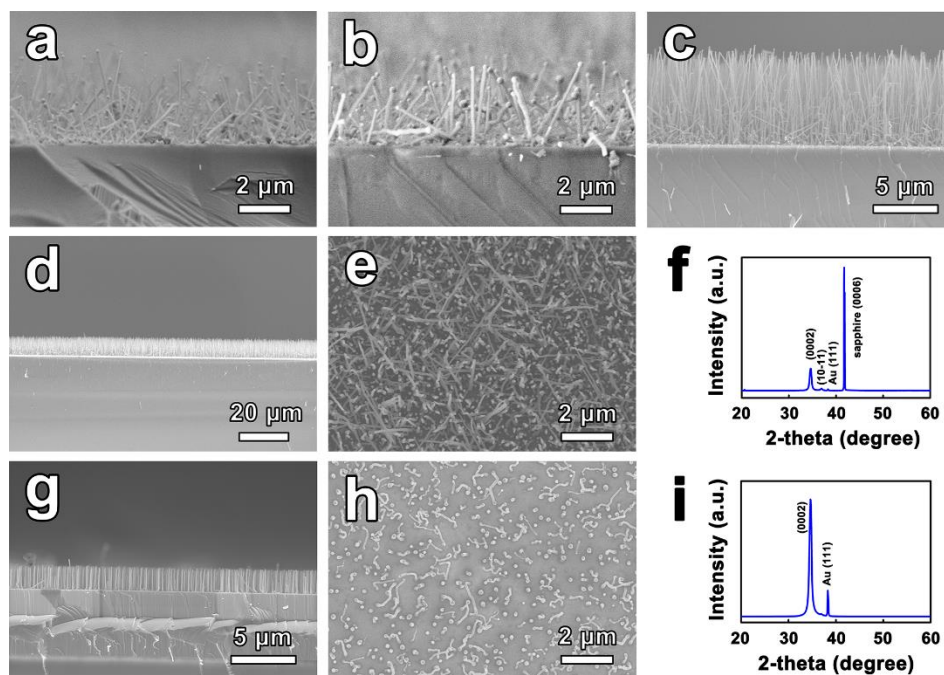

**Fig. S2** SEM images of GaN nanowires grown on c-sapphire substrate with  $\text{NH}_3$  flow rate of (a) 50 sccm, (b) 25 sccm and (c) 15 sccm, respectively. Side- and top-view SEM images and corresponding XRD patterns of GaN nanoarrays grown on c-sapphire for 30 min (d-f) and c-GaN/sapphire substrate for 15 min (g-i) with  $\text{NH}_3$  flow rate of 10 sccm.

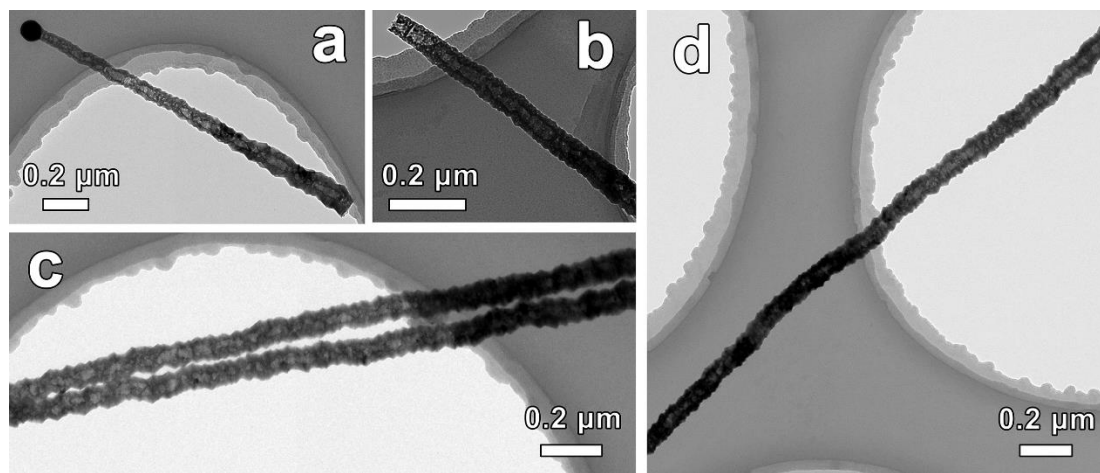

**Fig. S3** Low-magnification TEM images of [0001]-oriented GaN nanowires grown by modified HVPE technique for (a, b) 5 min and (c, d) 30 min.

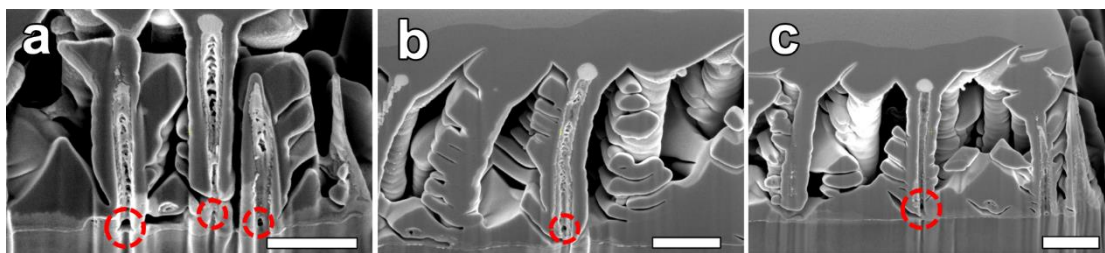

**Fig. S4** SEM images of the longitudinal section sample of the vertically epitaxial GaN nanowires prepared by FIB technique in the double beam xenon ion microscope system (Scale bar = 1  $\mu\text{m}$ ).

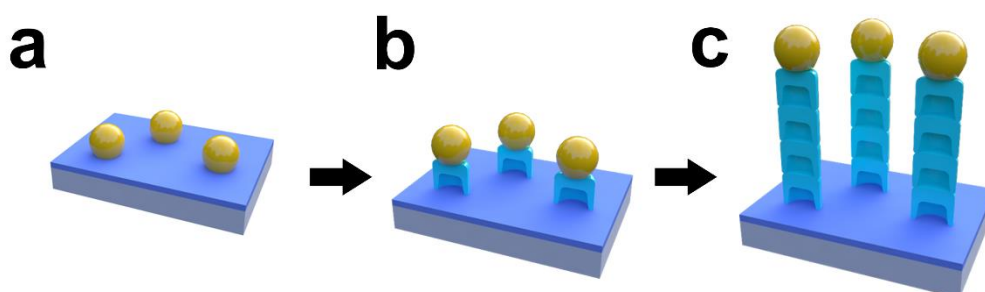

**Fig. S5** Schematic illustration describing the growth mechanism of bamboo-like hollow GaN nanowire arrays: (a) the formation of Au-Ga alloy particles; (b) initial nucleation of the hollow GaN nuclei and (c) subsequent growth of vertical GaN nanowire array with discontinuous hollow structure.

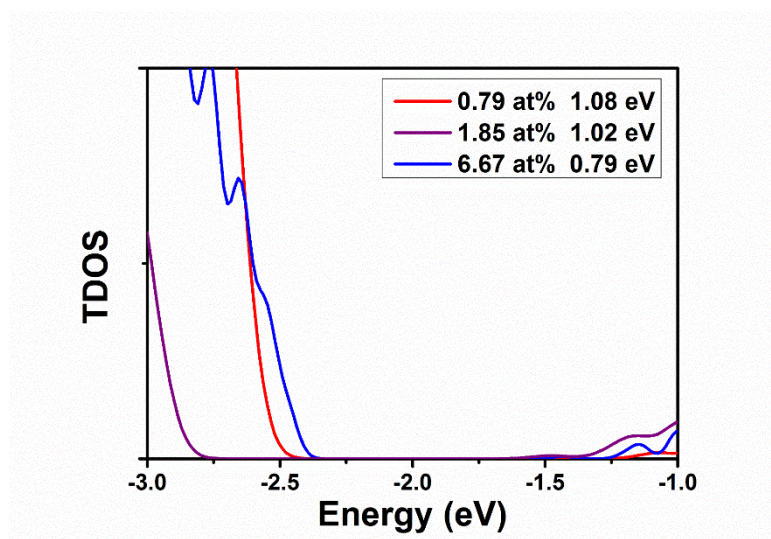

**Fig. S6** Total density of states and calculated bandgaps of Cl-doped GaN with Cl doping density of 0.79 at%, 1.85 at% and 6.67 at%.
